# Supplementary material
Source: ML conference proceedings conference paper supplement (https://openreview.net/forum?id=1OkVexYLct)
Supplement: supplementary_material [file attachment]

# REVISITING THE OTHELLO WORLD MODEL HYPOTHESIS

**Anonymous authors**

Paper under double-blind review

## ABSTRACT

Li et al. (2023) used the Othello board game as a test case for the ability of GPT-2 to induce world models, and were followed up by Nanda et al. (2023). We briefly discuss the original experiments, expanding them to include more language models with more comprehensive probing. Specifically, we analyze sequences of Othello board states and train the model to predict the next move based on previous moves. We evaluate six language models (GPT-2, T5, Bart, Flan-T5, Mistral, and LLaMA-2) on the Othello task and conclude that these models not only learn to play Othello, but also induce the Othello board layout. We find that all models achieve up to 99% accuracy in *unsupervised* grounding and exhibit high similarity in the board features they learned. This provides considerably stronger evidence for the Othello World Model Hypothesis than previous works.

## 1 INTRODUCTION

Li et al. (2023) used the Othello board game to probe the ability of LLMs to induce world models. Their network had a 60-word input vocabulary, corresponding to the 64 tiles of an Othello board, except for the four that are already filled at the start. They trained the network on two datasets: one on about 140,000 real Othello games and another on millions of synthetic games. They then trained 64 independent non-linear probes (two-layer MLP classifiers) to classify each of the 64 tiles into three states: black, blank, and white, using internal representations from Othello-GPT as input. The error rates of these non-linear probes dropped from 26.2% on a randomly-initialized model to only 1.7% on a trained model, while linear probes performed close to random. Li et al. (2023) saw this as evidence that LLMs can induce (non-linear) world models, at least for Othello board games, supporting the Othello World Model Hypothesis – the hypothesis that LLMs trained on Othello move sequences can induce a relevant world model, including the Othello board layout.

Nanda et al. (2023) did a follow-up study in which they found that linear probes also work if trained slightly differently. Instead of focusing on tile color, they probed the board state relative to the current player at each timestep, using labels such as MINE, YOURS, and EMPTY. This reduced the error rate of the probes to less than 10%. They speculated that world knowledge is often linearly represented in language models, since ‘matrix multiplication can easily extract a different subset of linear features for each neuron.’

Now, training a probe as a research methodology comes with several weaknesses, including: a) Probing classifiers can be prone to spurious correlations (Barrett et al., 2019). b) They do not tell us how information is arranged globally in LLMs.<sup>1</sup> c) They therefore only detect a subset of the interesting properties of world models, e.g., excluding the spatial relations that would enable analogical reasoning (Mikolov et al., 2013).

**Contributions** We therefore revisit the Othello World Model Hypothesis, reevaluating it using a methodology that does not suffer from weaknesses a)–c) (see Figure 1), in order to reassess the ability of LLMs to induce world models. If our results are positive, they will significantly strengthen the case for the hypothesis that LLMs induce

<sup>1</sup>Li et al. (2023) tried to compensate for this by using PCA to plot the probing classifiers in three dimensions. The PCA plots suggest that the induced global structure is meaningful, but the probing paradigm cannot quantify its meaningfulness.

world models; if not, they will suggest that the evidence cited in Li et al. (2023) and Nanda et al. (2023) was perhaps a (spurious) effect of the probing paradigm itself. We begin by re-modeling Othello using a range of model sizes (GPT-2, BART, T5, Flan-T5, LLaMA-2, Mistral), as prior research has predominantly focused on smaller models like GPT-2. We retrain these models using game data of varying scales from the two datasets presented by Li et al. (2023). Our analysis extends beyond previous studies by considering both pretrained and non-pretrained models (based on upstream language tasks), evaluating two-hop generation capabilities, and comparing models of varying sizes. To assess whether these models capture similar underlying game strategies, state representations, or other key aspects, despite differences in architecture and size, we employ representation alignment tools inspired by the literature on cross-lingual word embeddings (Søgaard et al., 2019). Finally, we visualize these results through latent move projections, enabling a deeper analysis of the internal mechanisms of models trained on the Othello game. Through these probing methods, we show that the language models – exhibit solid one-hop performance when trained on large amount of game sequence moves. We find that in some cases, all models can achieve up to 99% accuracy in unsupervised grounding, which means that absent any cross-modal supervision, a model *trained to play* Othello can identify the right positions on a board. More importantly, the alignment similarity score of the board features learned by these models is surprisingly high. Additionally, the latent move projection demonstrates that the models can learn the spatial structure of the chessboard. This provides a direct counter-example to previous claims that mono-modal models cannot solve visual question answering problems (Bender & Koller, 2020) – or, more generally, symbol grounding problems (Harnad, 1990). These results are significantly stronger than those in Li et al. (2023); Nanda et al. (2023) and, in our view, provide more direct evidence of the Othello World Model Hypothesis.

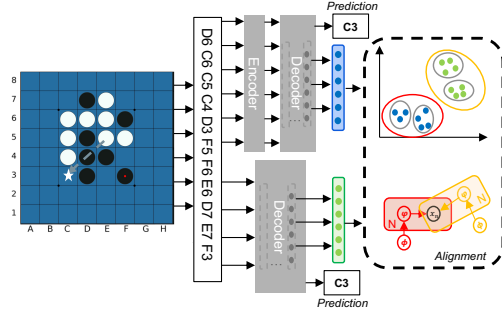

Figure 1: Experimental protocol. We re-train the Transformer-based models to predict the next move in Othello and see whether the board game layout is induced (up to isomorphism).

## 2 RELATED WORK

**Past work on Othello** Most past works on Othello (Chang et al., 2018; van der Ree & Wiering, 2013) use reinforcement learning to search for moves. The first attempt to model Othello with deep neural networks dates back to 2018 (Liskowski et al., 2018), focusing on using CNNs to train a strong player. Based on it, Noever & Noever (2022) focus on designing an effective Othello player with LLMs. Motivated by Toshniwal et al. (2021), Li et al. (2023) shift the focus to treating the game as a diagnostic tool for inducing world models from text. Following this, Nanda et al. (2023) provide evidence of a closely related linear representation of the board and propose a simple yet powerful way to interpret the model’s internal state. Takizawa (2024) recently presents a provably optimal strategy for playing Othello, exploring the complexity of these strategies and whether LLMs adopt similar ones. Hua et al. (2024) adopt the idea of Othello sequence generation and introduce a Multilingual Othello task to aid in cross-lingual representation alignment.

**World models** The success of language models in NLP tasks, to many, seems to turn on their ability to simulate, predict, and reason about dynamic environments as portrayed in text (Hao et al., 2023; Huh et al., 2024; Patel & Pavlick, 2022; Xiang et al., 2023). The seminal work of Li et al. (2021) presents an example of fine-tuning LLMs on synthetic NLP tasks to find evidence that world states are weakly encoded in their activations. Wang et al. (2024) evaluate how well LLMs can serve as text-based world simulators with a benchmark. Inspired by Othello-GPT, research have explored more detailed probing (Yun et al., 2023; Hazineh et al., 2023) and more complex scenarios to assess the ability of LLMs to understand board states, including for games like chess, checker and maze navigation (Karvonen, 2024; Joshi et al., 2024; Ivanitskiy et al., 2023). Our work aims to revisit the Othello World Hypothesis using a novel probing method across a number of different LLMs.

| Method  | Type | P | CHAMPIONSHIP |            |            | SYNTHETIC   |             |             |            |      |
|---------|------|---|--------------|------------|------------|-------------|-------------|-------------|------------|------|
|         |      |   | 2k           | 20k        | full       | 2k          | 20k         | 200k        | 2M         | full |
| GPT-2   | D    | ✗ | 49.8         | 17.7       | 5.6        | 49.2        | 26.8        | <b>13.6</b> | 10.4       | <0.1 |
| Bart    | E-D  | ✗ | 25.2         | 16.6       | 4.7        | 73.6        | 31.7        | 14.2        | 16.3       | <0.1 |
| T5      | E-D  | ✗ | <b>20.9</b>  | 15.2       | 4.3        | 65.8        | 28.7        | 15.7        | 10.1       | <0.1 |
| Flan-T5 | E-D  | ✗ | 23.4         | <b>4.8</b> | <b>3.6</b> | <b>35.6</b> | <b>23.7</b> | 21.2        | <b>7.7</b> | <0.1 |
| LlaMa-2 | D    | ✗ | 27.8         | 16.5       | 5.7        | 57.1        | 35.4        | 16.9        | 10.2       | <0.1 |
| Mistral | D    | ✗ | 22.1         | 14.8       | 4.2        | 48.2        | 34.4        | 17.7        | 8.3        | <0.1 |
| GPT-2   | D    | ✓ | 52.6         | 19.7       | 13.6       | 74.4        | 32.4        | 19.9        | 14.1       | <0.1 |
| Bart    | E-D  | ✓ | 54.0         | 14.6       | 13.7       | 77.2        | 35.8        | 24.4        | 16.6       | <0.1 |
| T5      | E-D  | ✓ | 45.5         | 19.6       | 3.8        | 69.4        | 36.9        | 32.6        | 13.9       | <0.1 |
| Flan-T5 | E-D  | ✓ | 31.7         | <b>4.8</b> | 3.7        | 70.3        | <b>25.4</b> | 45.0        | 8.7        | <0.1 |
| LlaMa-2 | D    | ✓ | 43.1         | 14.7       | 7.0        | 74.6        | 41.5        | 33.4        | <b>7.6</b> | <0.1 |
| Mistral | D    | ✓ | <b>16.8</b>  | 15.0       | <b>3.3</b> | <b>33.8</b> | 30.6        | <b>18.2</b> | 7.7        | <0.1 |

Table 1: The error rate (%) of 1-hop game state generation in terms of different size of training data. ‘Type’ refers to the model type, ‘P’ denotes if the model is pretrained with upstream language modeling tasks or not. Numbers in bold represent best-performing models.

### 3 MODELING OTHELLO WITH LLMs

Following previous works (Liskowski et al., 2018; Li et al., 2023; Nanda et al., 2023), we formulate the problem of playing the board game as a sequence generation problem. Specifically, we fine-tune generative pretrained models in an autoregressive manner to predict the next move given the current Othello board state. Each game is a sequence, with each move represented as a token, and in each round, we predict the next move. Our vocabulary consists of 60 words, each representing one of the 60 playable tiles where players place discs, excluding the 4 center tiles, which are already occupied at the start of the game. See Figure 1 for an example move. Our modeling of Othello, in brief, can be represented as:

$$p_{\theta}(X_{i+k}|X_{<i}) = \prod_{m=0}^k p_{\theta}(X_{i+m}|X_{<i}) = \prod_{m=0}^k \text{softmax}(f_{i+m}(x_1, x_2, \dots, x_{i+m-1})) \quad (1)$$

where  $x_1, x_2, \dots, x_{i-1}$  represent history moves,  $X_{i+k}$  represents the sequence after  $k$  generation steps. During inference, we input the previously generated game moves  $X_{<i}$  at step  $i$  into the model and prompt it to generate the next steps. Unlike previous works, we not only prompt the model to generate the next move ( $k = 1$ ) but also introduce a new test where the model generates two consecutive moves ( $k = 2$ ).

#### 3.1 EXPERIMENTAL SETUP

We use two datasets in our experiments, **CHAMPIONSHIP** and **SYNTHETIC**. Both of them were collected by Li et al. (2023). **CHAMPIONSHIP** comes from real online Othello gaming sources, whereas **SYNTHETIC** is artificially generated according to the rules of Othello game play. Detailed statistics see Appendix A. We use the last 20,000 games from each dataset for testing and validation (10,000 games each). Following Li et al. (2023), we report the top-1 error rate, including both 1-hop and 2-hop generation. This involves verifying whether the top-1 prediction is legal when the model is prompted to generate 1 and 2 moves at a time. We present the average error rate across all game sequences. We implement all of the baselines under the Pytorch framework and the HuggingFace model repository. We conduct all of our experiments using 8 A100 GPUs. We use all the default parameters in the repository when fine-tuning.

We perform our experiments using several existing baselines, with both Encoder-Decoder or Decoder-only structures. We first adopt some popular PLMs such as GPT-2 (Radford et al., 2019), T5 (Raffel et al., 2019), and Bart (Lewis et al., 2019). We adopt several LLMs to see their performance on this task, including Flan-T5 (Chung et al., 2022), LlaMa-2 (Touvron et al., 2023), and Mistral (Jiang et al., 2023). Details see Appendix B.

| Method  | Type | P | CHAMPIONSHIP |             |             | SYNTHETIC   |             |             |             |            |
|---------|------|---|--------------|-------------|-------------|-------------|-------------|-------------|-------------|------------|
|         |      |   | 2k           | 20k         | full        | 2k          | 20k         | 200k        | 2M          | full       |
| GPT-2   | D    | ✗ | 78.5         | 34.7        | 28.1        | 76.3        | 70.8        | <b>43.6</b> | 29.0        | 5.2        |
| Bart    | E-D  | ✗ | 54.2         | 31.1        | 23.4        | 86.5        | 67.2        | 44.8        | 35.7        | 4.2        |
| T5      | E-D  | ✗ | <b>48.8</b>  | 28.7        | 24.4        | 88.2        | 67.7        | 46.9        | 35.9        | 3.4        |
| Flan-T5 | E-D  | ✗ | 51.8         | <b>20.8</b> | <b>21.9</b> | 79.6        | <b>63.1</b> | 48.6        | 26.7        | <b>2.8</b> |
| LlaMa-2 | D    | ✗ | 60.9         | 36.3        | 26.4        | 87.3        | 67.8        | 45.2        | 36.3        | 5.5        |
| Mistral | D    | ✗ | 51.4         | 31.7        | 22.3        | <b>71.2</b> | 77.1        | 47.9        | <b>26.4</b> | 3.0        |
| GPT-2   | D    | ✓ | 92.2         | 43.4        | 37.2        | 99.6        | <b>72.6</b> | 45.5        | 34.4        | 6.2        |
| Bart    | E-D  | ✓ | 87.0         | 34.5        | 27.1        | 97.8        | 76.9        | 64.0        | 44.5        | 5.1        |
| T5      | E-D  | ✓ | 86.5         | 36.4        | 27.0        | 99.6        | 78.8        | 59.9        | 46.9        | 4.6        |
| Flan-T5 | E-D  | ✓ | 67.9         | <b>31.8</b> | 26.5        | 98.6        | 80.8        | 79.7        | 35.3        | 3.9        |
| LlaMa-2 | D    | ✓ | 66.9         | 33.4        | 33.0        | 94.2        | 77.6        | 62.1        | <b>33.2</b> | 5.2        |
| Mistral | D    | ✓ | <b>52.0</b>  | 40.8        | <b>25.4</b> | <b>80.3</b> | 76.0        | <b>42.3</b> | 35.0        | <b>3.8</b> |

Table 2: The error rate (%) of 2-hop game state generation.

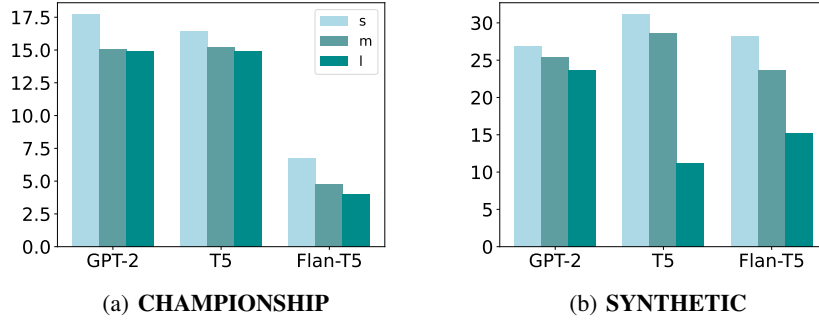

Figure 2: Othello 1-hop generation performance under different model sizes. All models are non-pretrained versions fine-tuned with 20k game sequences.

### 3.2 EVALUATION OF LLM PERFORMANCE IN OTHELLO MOVE GENERATION

We perform experiments using various methods and present the results in Tables 2 and 3. From our observations, several key findings emerge. Firstly, there is **no clear winner** between models with an Encoder-Decoder architecture, such as T5 or Flan-T5, and those with a Decoder-only architecture, such as GPT-2 or LLaMA-2, in terms of performance on this task. This indicates that the architectural differences between these models do not significantly impact their ability to generate Othello game steps. However, one consistent trend is the positive correlation between the amount of training data and overall model performance. As we increase the scale of the training data, all models tend to improve, underscoring the importance of data availability in mastering complex tasks like Othello move generation. In comparison to smaller language models, LLMs such as Mistral and Flan-T5 demonstrate clear superiority in this task, suggesting that **model size and capacity** are critical factors in understanding Othello game step generation. Larger models are better equipped to capture the intricate patterns and strategies within the game, likely due to their increased representational capacity. Interestingly, we also find that pretrained language knowledge, while generally beneficial for a wide range of natural language tasks, sometimes **negatively impacts** a model’s ability to understand and generate game steps. Specifically, the pretrained versions of many models perform worse than their non-pretrained counterparts in this task, which could indicate that knowledge learned from upstream language tasks introduces biases or distracts from learning the specific structure and rules of Othello. Furthermore, while fine-tuning models on a large amount of data leads to reasonable performance in generating a single step (1-hop), generating more than one step consecutively remains a significant challenge. Even with large-scale data, models struggle to accurately predict two or more consecutive moves.

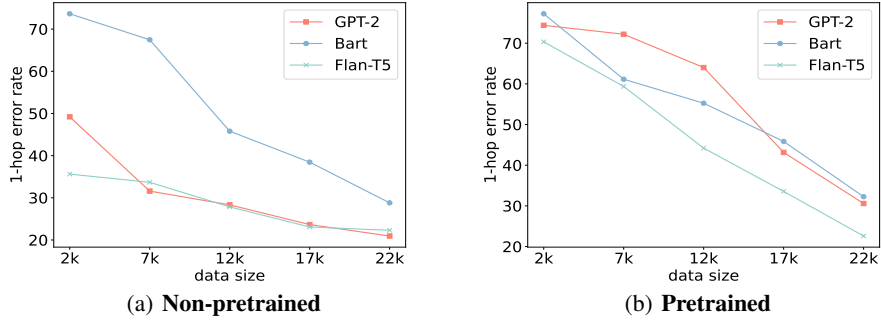

Figure 3: Analysis of 1-hop error rates on the SYNTHETIC dataset with varying data scales.

### 3.3 IMPACT OF MODEL SIZE ON OTHELLO MOVE GENERATION

To further explore the impact of model size on the ability to model Othello moves, we analyze the performance of various models across different size configurations, as depicted in Figure 2. For each model, we evaluate performance in small, medium, and large size versions, allowing us to compare how scaling up model capacity affects accuracy in generating game moves. The results show a clear trend: **as model size increases, the error rate consistently decreases across both datasets**. This trend is particularly pronounced in the SYNTHETIC dataset, where larger models achieve significantly lower error rates compared to their smaller counterparts. The stronger improvement in the SYNTHETIC dataset suggests that larger models are better at capturing the structured patterns present in the synthetic data, likely due to their enhanced capacity for learning complex representations and generalizing across more varied scenarios. These findings highlight the importance of model scaling, showing that increasing the model size can lead to substantial performance gains in Othello move generation, especially in environments where the data is highly structured or synthetic in nature. Furthermore, the results emphasize that larger models are not just marginally better, but often significantly outperform smaller models, reinforcing the need to consider model capacity as a critical factor when tackling tasks that require a deep understanding of game strategies and sequential decision-making processes.

### 3.4 IMPACT OF DATA SIZE ON OTHELLO MOVE GENERATION

In Table 2, we observe a sharp decrease in model error rates as the dataset size increases from 2k to 20k. To investigate this further, we conduct an analysis by gradually enlarging the SYNTHETIC dataset from 2k to 22k. According to Figure 3, the performance of all models improves gradually as the dataset size increases. Interestingly, pretrained models demonstrate a more consistent and steady decrease in error rate compared to non-pretrained models. This suggests that pretrained models are able to effectively utilize the additional data to refine their representations and decision-making processes in a more stable manner, benefiting incrementally from larger datasets. In contrast, non-pretrained models show a more pronounced reduction in error rates within the 2k to 12k data size range, with diminishing improvements beyond that point. This indicates that while non-pretrained models experience substantial early gains from additional training data, their performance plateaus at larger dataset sizes, likely because they have already captured the most critical game strategies from the smaller datasets. The divergent behavior between pretrained and non-pretrained models suggests that pretraining on upstream natural language tasks enables models to leverage larger datasets for gradual improvements, whereas non-pretrained models rely more heavily on immediate learning from the provided game-specific data. The initial sharp gains for non-pretrained models also imply that these models are more sensitive to smaller datasets, rapidly improving as they acquire game-specific knowledge but requiring increasingly larger datasets for further marginal gains.

## 4 OTHELLO REPRESENTATION ALIGNMENT ACROSS LANGUAGE MODELS

Drawing inspiration from the literature on cross-lingual word embeddings, we perform Othello representation alignment across different models to compare how each model, despite differences in architecture and size, internalizes and represents game strategies and states. This helps us assess whether the learned representations in Section 3 are consistent across models and whether they capture similar underlying patterns essential for accurate Othello move generation.

### 4.1 ALIGNMENT METHOD

To validate the Othello World Model Hypothesis, we directly evaluate the internal representation of the Othello board in language models. Using the representations from different models, denoted as  $F_1, F_2$  from the same input sequence  $X_{<i}$ , we perform mapping training under both *supervised* and *unsupervised* scenarios<sup>2</sup>. A linear mapping  $W$  is learned to map  $F_1$  and  $F_2$  into the same space:

$$W^* = \arg \min_{W \in M_i(\mathbb{R})} \|WF_1 - F_2\| \quad (2)$$

where  $F_1, F_2 \in \mathbb{R}^{i \times h}$  are representations from the final hidden Decoder layer in different language models trained for Othello generation.  $M_i(\mathbb{R})$  is the space of  $i \times i$  matrices of real numbers.

**Supervised training.** We consider the internal representations of different models within different source and target spaces. For supervised training (see Algorithm 1<sup>3</sup>, we use the pairwise data to learn a mapping from the source to the target space using iterative Procrustes alignment (Gower & Dijksterhuis, 2004). We use representations from two models as training pairs. Specifically, the representations of the  $i$ th step within the same game from the two models are considered a pair, denoted as  $h_{\theta_1}(X_{<i})$  and  $h_{\theta_2}(X_{<i})$ , respectively. In our experiment, we randomly select 1,000 game sequences from the validation set as training pairs.

---

#### Algorithm 1: Supervised Training for Othello Representation Alignment

---

**Inputs :**

$h_{\theta_1}(\cdot), h_{\theta_2}(\cdot)$  representations from the final hidden layer of Decoder in two models:  $\Theta_1, \Theta_2$   
 $X_{<i} = \{x_1, \dots, x_{i-1}\}$  input game sequence at time step  $i$   
 $r$  number of refinement iterations

**Output:**

$s$  Similarity score of the aligned feature learned from the two models  
 $F_1 \leftarrow h_{\theta_1}(X_{<i}), F_2 \leftarrow h_{\theta_2}(X_{<i})$   
**for**  $i = 1$  **to**  $r$  **do**  
  **if**  $i! = 1$  **then**  
     $F_1 \leftarrow \text{BuildDic}(F_1), F_2 \leftarrow \text{BuildDic}(F_2)$  // build a dictionary from aligned  
    embeddings containing best aligned pairs  
     $W \leftarrow \text{Procrustes}(F_1, F_2)$   
     $F_1 \leftarrow WF_1$   
 $s \leftarrow \text{CosSim}(F_1, F_2)$

---

**Unsupervised training.** For unsupervised training, without any parallel data or anchor points, following Conneau et al. (2018), we learn the mapping through a combination of adversarial training and iterative Procrustes refinement (Lample et al., 2018) (see Algorithm 2). The process involves first learning an initial proxy of the mapping  $W$  using an adversarial criterion. Where an additional Discriminator model is trained to identify the origin of an embedding, yet the target mapping  $W$  aims at preventing the discriminator from doing so. Then, the mapping  $W$  is further refined via Procrustes using the same strategy in supervised training. We then report the average cosine similarity of the aligned features on the test set.

<sup>2</sup>Both of the algorithms are implemented using MUSE, a library designed for multilingual embedding alignment (<https://github.com/facebookresearch/MUSE>).

<sup>3</sup>More details (e.g. BuildDict() of Algorithms 1, 2) see Conneau et al. (2018).



This result highlights a level of consistency and robustness in the way generative models process game-related information. Despite differences in architecture or training objectives, the models seem to internalize and represent Othello game states in a similar manner. This convergence suggests that these models, when trained on the Othello task, are not only learning task-specific patterns but are also aligning on a shared understanding of the underlying problem space. To sum up, such alignment enhances the interpretability of these models, as their internal representations become more comparable.

#### 4.4 MAPPING ACROSS DIFFERENT LAYERS

We compare the mapping similarity across different Decoder hidden layers in GPT-2 and Flan-T5<sup>5</sup> to understand how each model progressively learns to represent the Othello game, evolving from simple board states to more complex strategies. As shown in Figure 5, despite their structural differences, GPT-2 and Flan-T5 exhibit similar learned representations at corresponding layers. Both models, when trained on Othello game sequences, seem to converge toward learning comparable internal representations, as highlighted by the heatmap. This conclusion is supported by the following observations:

(1) **High Similarity in the Upper Right Diagonal.** The heatmap reveals a prominent diagonal pattern where corresponding layers from GPT-2 and Flan-T5 show high similarity, especially in the upper half of the heatmap. This suggests that, despite their differing architectures (GPT-2 being autoregressive and Flan-T5 following an Encoder-Decoder structure), models eventually learn something in common (particularly at layer 11, where high similarity is observed). despite the difference from the beginning. This alignment indicates that their layer-wise learning processes evolve in comparable ways as they both adapt to the Othello game environment. (2) **Layer-Specific Correspondences.** We notice that specific layers in GPT-2 show high similarity with certain layers in Flan-T5, even though they may not follow a strict diagonal pattern, this suggests that both models are learning certain shared features or patterns in game sequences at particular stages of their processing pipelines.

## 5 LATENT MOVE PROJECTION: WHAT ELSE DOES LLMs LEARN?

To gain deeper insights into how models learn strategies and predict future moves, we project latent features onto a visual space. For a given game sequence  $X_{<i}$ , we highlight the top-5 candidate tile positions with the highest predicted probabilities for the next move. Additionally, we compare the embeddings of the top candidate tile with those of the other tiles. We mark the top three tiles whose embeddings are closest to the top candidate to examine their spatial relationships on the board.

We perform latent move projection on the Othello game steps of two models in Figure 6. It shows that both models successfully predict legal moves given a game sequence. Moreover, other legal

<sup>5</sup>We use GPT-2-small and Flan-T5-Base trained on 20k SYNTHETIC dataset, as both have 12 decoder hidden layers.

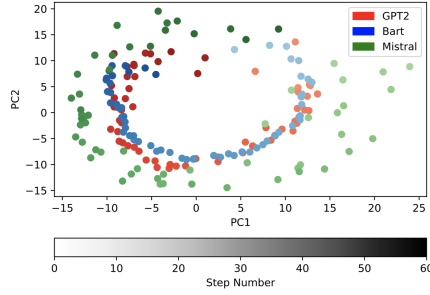

Figure 4: PCA visualization of the 60 steps from various models within one game.

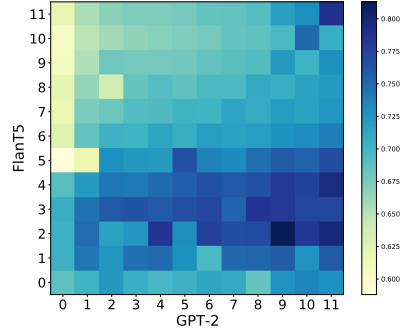

Figure 5: Decoder feature similarity heatmap across different layers.



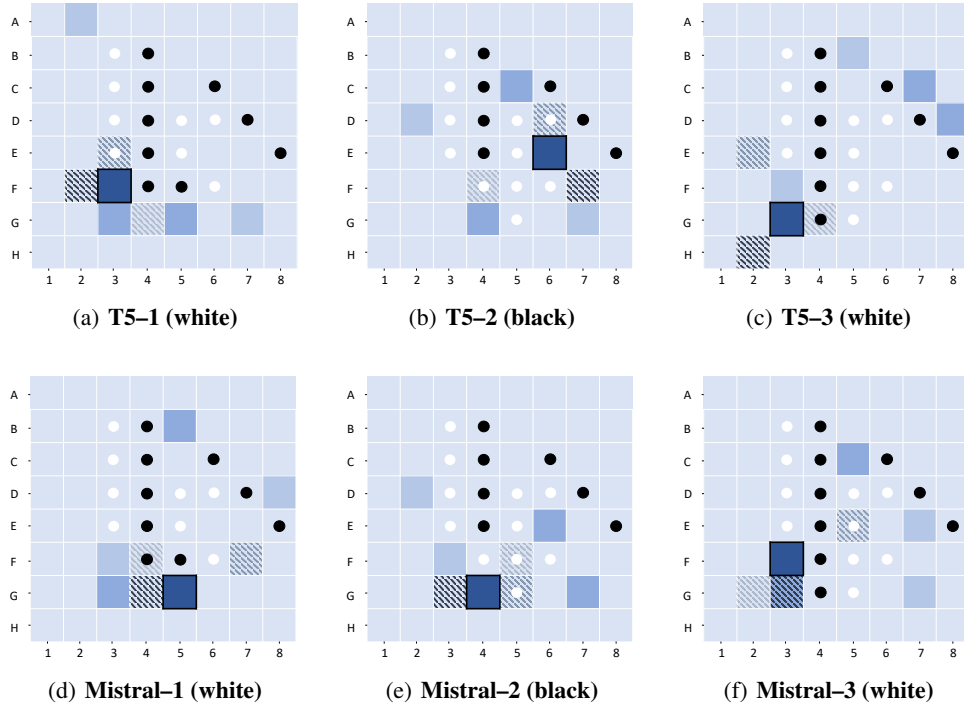

Figure 6: Othello latent move projection from two best performed models. Colors indicate the likelihood of the position of the next step. Shadows highlight the top three tiles with embeddings closest to the top candidate, with the darkest color in the black box.

moves are also assigned high prediction scores (tiles with lighter blue) by the models. This proves that with a large amount of game sequence data, the model learns the policy of the game. To further investigate whether the models can capture the physical position of each tile, we use shadow marks to highlight the tiles with the closest embedding distance to the tile in the black box. The intensity of the shadow reflects the degree of similarity. We observe that the top-1 tile with the highest similarity (F2 in Figure 6(a), G4 in Figure 6(d)) is the one adjacent to the black box tile in both models. This indicates that the models not only understand the game mechanics but also capture the spatial relationships between tiles.

## 6 LIMITATIONS

Although this work demonstrates the ability of different language models to understand Othello game rules, several limitations persist that require further investigation:

**Challenges in Multi-step Move Generation.** While language models can predict the next move with reasonable accuracy, they struggle to predict entire game sequences. The key question is whether strong multi-step performance is a reasonable expectation. Due to the influence of distinct player strategies and the rotational invariance of the board, many game states inherently underdetermine what constitutes the subjectively or objectively best move. As a result, the ability to accurately predict entire sequences may remain elusive, given the complexity and variability of decision-making in the game.

**Limitations in Data Requirements.** Our experiments show that reducing the 1-hop error rate to less than 0.1% demands a large volume of training data. This reliance on vast datasets presents a scalability issue, as access to Othello game data is limited. Moreover, training on such large datasets is computationally expensive and time-consuming, which can be a prohibitive factor for many researchers or organizations without access to substantial computational resources.

## 7 CONCLUSION

We conduct a detailed probing of language models’ ability to predict legal moves in the Othello board game, based on the settings in Li et al. (2023). We evaluate six language models, training them to predict the next move based on previous moves. All six models achieve almost ‘perfect’ one-hop move prediction performance when trained with large amount of data. We then adopt representation alignment tools to align the learned game state features from different models into one joint space. We observe high similarity in the board features they learned. In addition, latent move projection is performed to show the models not only understand the game mechanics but also capture the spatial relationships between tiles. These results, in our view, provide more solid evidence to date of the Othello World Model Hypothesis presented in previous works.

## REFERENCES

- Maria Barrett, Yova Kementchedjhieva, Yanai Elazar, Desmond Elliott, and Anders Søgaard. Adversarial removal of demographic attributes revisited. In Kentaro Inui, Jing Jiang, Vincent Ng, and Xiaojun Wan (eds.), *Proceedings of the 2019 Conference on Empirical Methods in Natural Language Processing and the 9th International Joint Conference on Natural Language Processing (EMNLP-IJCNLP)*, pp. 6330–6335, Hong Kong, China, November 2019. Association for Computational Linguistics. doi: 10.18653/v1/D19-1662. URL <https://aclanthology.org/D19-1662>.
- Emily M. Bender and Alexander Koller. Climbing towards NLU: On meaning, form, and understanding in the age of data. In *Proceedings of the 58th Annual Meeting of the Association for Computational Linguistics*, pp. 5185–5198, Online, July 2020. Association for Computational Linguistics. doi: 10.18653/v1/2020.acl-main.463. URL <https://aclanthology.org/2020.acl-main.463>.
- Naiyuan Chang, Chih-Hung Chen, Shun-Shii Lin, and Surag Nair. The big win strategy on multi-value network: An improvement over alphazero approach for 6x6 othello. *Proceedings of the 2018 International Conference on Machine Learning and Machine Intelligence*, 2018. URL <https://api.semanticscholar.org/CorpusID:54461634>.
- Hyung Won Chung, Le Hou, S. Longpre, Barret Zoph, Yi Tay, William Fedus, Eric Li, Xuezhi Wang, Mostafa Dehghani, Siddhartha Brahma, Albert Webson, Shixiang Shane Gu, Zhuyun Dai, Mirac Suzgun, Xinyun Chen, Aakanksha Chowdhery, Dasha Valter, Sharan Narang, Gaurav Mishra, Adams Wei Yu, Vincent Zhao, Yanping Huang, Andrew M. Dai, Hongkun Yu, Slav Petrov, Ed Huai hsin Chi, Jeff Dean, Jacob Devlin, Adam Roberts, Denny Zhou, Quoc V. Le, and Jason Wei. Scaling instruction-finetuned language models. *ArXiv*, abs/2210.11416, 2022. URL <https://api.semanticscholar.org/CorpusID:253018554>.
- Alexis Conneau, Guillaume Lample, Marc’Aurelio Ranzato, Ludovic Denoyer, and Hervé Jégou. Word translation without parallel data. *The Sixth International Conference on Learning Representations*, 2018.
- John C Gower and Garnt B Dijksterhuis. *Procrustes problems*, volume 30. OUP Oxford, 2004.
- Shibo Hao, Yi Gu, Haodi Ma, Joshua Jiahua Hong, Zhen Wang, Daisy Zhe Wang, and Zhiting Hu. Reasoning with language model is planning with world model. *ArXiv*, abs/2305.14992, 2023. URL <https://api.semanticscholar.org/CorpusID:258865812>.
- Stevan Harnad. The symbol grounding problem. *Physica D*, 42:335–346, 1990.
- Dean S. Hazineh, Zechen Zhang, and Jeffery Chiu. Linear latent world models in simple transformers: A case study on othello-gpt. *ArXiv*, abs/2310.07582, 2023. URL <https://api.semanticscholar.org/CorpusID:263834692>.
- Tianze Hua, Tian Yun, and Ellie Pavlick. mothello: When do cross-lingual representation alignment and cross-lingual transfer emerge in multilingual models? *ArXiv*, abs/2404.12444, 2024. URL <https://api.semanticscholar.org/CorpusID:269282665>.

- Minyoung Huh, Brian Cheung, Tongzhou Wang, and Phillip Isola. The platonic representation hypothesis. 2024. URL <https://api.semanticscholar.org/CorpusID:269757765>.
- Michael I. Ivanitskiy, Alex F Spies, Tilman Rauker, Guillaume Corlouer, Chris Mathwin, Lucia Quirke, Can Rager, Rusheb Shah, Dan Valentine, Cecilia G. Diniz Behn, Katsumi Inoue, and Samy Wu Fung. Structured world representations in maze-solving transformers. *ArXiv*, abs/2312.02566, 2023. URL <https://api.semanticscholar.org/CorpusID:265659365>.
- Albert Qiaochu Jiang, Alexandre Sablayrolles, Arthur Mensch, Chris Bamford, Devendra Singh Chaplot, Diego de Las Casas, Florian Bressand, Gianna Lengyel, Guillaume Lample, Lucile Saulnier, L’elio Renard Lavaud, Marie-Anne Lachaux, Pierre Stock, Teven Le Scao, Thibaut Lavril, Thomas Wang, Timothée Lacroix, and William El Sayed. Mistral 7b. *ArXiv*, abs/2310.06825, 2023. URL <https://api.semanticscholar.org/CorpusID:263830494>.
- Abhinav Joshi, Vaibhav Sharma, and Ashutosh Modi. Checkersgpt: Learning world models through language modeling. In *Annual Meeting of the Association for Computational Linguistics*, 2024. URL <https://api.semanticscholar.org/CorpusID:272779453>.
- Adam Karvonen. Emergent world models and latent variable estimation in chess-playing language models. *ArXiv*, abs/2403.15498, 2024. URL <https://api.semanticscholar.org/CorpusID:268681535>.
- Guillaume Lample, Alexis Conneau, Ludovic Denoyer, and Marc’Aurelio Ranzato. Unsupervised machine translation using monolingual corpora only. *The Sixth International Conference on Learning Representations*, 2018.
- Mike Lewis, Yinhan Liu, Naman Goyal, Marjan Ghazvininejad, Abdel rahman Mohamed, Omer Levy, Veselin Stoyanov, and Luke Zettlemoyer. Bart: Denoising sequence-to-sequence pre-training for natural language generation, translation, and comprehension. In *Annual Meeting of the Association for Computational Linguistics*, 2019. URL <https://api.semanticscholar.org/CorpusID:204960716>.
- Belinda Z. Li, Maxwell Nye, and Jacob Andreas. Implicit representations of meaning in neural language models. In *Annual Meeting of the Association for Computational Linguistics*, 2021. URL <https://api.semanticscholar.org/CorpusID:235294296>.
- Kenneth Li, Aspen K Hopkins, David Bau, Fernanda Viégas, Hanspeter Pfister, and Martin Wattenberg. Emergent world representations: Exploring a sequence model trained on a synthetic task. In *The Eleventh International Conference on Learning Representations*, 2023. URL [https://openreview.net/forum?id=DeG07\\_TcZvT](https://openreview.net/forum?id=DeG07_TcZvT).
- Paweł Liskowski, Wojciech Jaśkowski, and Krzysztof Krawiec. Learning to play othello with deep neural networks. *IEEE Transactions on Games*, 10(4):354–364, 2018. doi: 10.1109/TG.2018.2799997.
- Tomas Mikolov, Ilya Sutskever, Kai Chen, Greg S Corrado, and Jeff Dean. Distributed representations of words and phrases and their compositionality. In C.J. Burges, L. Bottou, M. Welling, Z. Ghahramani, and K.Q. Weinberger (eds.), *Advances in Neural Information Processing Systems*, volume 26. Curran Associates, Inc., 2013. URL [https://proceedings.neurips.cc/paper\\_files/paper/2013/file/9aa42b31882ec039965f3c4923ce901b-Paper.pdf](https://proceedings.neurips.cc/paper_files/paper/2013/file/9aa42b31882ec039965f3c4923ce901b-Paper.pdf).
- Neel Nanda, Andrew Lee, and Martin Wattenberg. Emergent linear representations in world models of self-supervised sequence models. In Yonatan Belinkov, Sophie Hao, Jaap Jumelet, Najoung Kim, Arya McCarthy, and Hosein Mohebbi (eds.), *Proceedings of the 6th BlackboxNLP Workshop: Analyzing and Interpreting Neural Networks for NLP*, pp. 16–30, Singapore, December 2023. Association for Computational Linguistics. doi: 10.18653/v1/2023.blackboxnlp-1.2. URL <https://aclanthology.org/2023.blackboxnlp-1.2>.
- Samantha E. Miller Noever and David Noever. Word play for playing othello (reverses), 2022.

- Roma Patel and Ellie Pavlick. Mapping language models to grounded conceptual spaces. In *International Conference on Learning Representations*, 2022. URL <https://api.semanticscholar.org/CorpusID:251647156>.
- Alec Radford, Jeff Wu, Rewon Child, David Luan, Dario Amodei, and Ilya Sutskever. Language models are unsupervised multitask learners. 2019. URL <https://api.semanticscholar.org/CorpusID:160025533>.
- Colin Raffel, Noam M. Shazeer, Adam Roberts, Katherine Lee, Sharan Narang, Michael Matena, Yanqi Zhou, Wei Li, and Peter J. Liu. Exploring the limits of transfer learning with a unified text-to-text transformer. *J. Mach. Learn. Res.*, 21:140:1–140:67, 2019. URL <https://api.semanticscholar.org/CorpusID:204838007>.
- Anders Søgaard, Ivan Vulić, Sebastian Ruder, and Manaal Faruqui. *Cross-Lingual Word Embeddings*. Synthesis Lectures on Human Language Technologies. Morgan Claypool Publishers, United States, 2 edition, 2019. doi: 10.2200/S00920ED2V01Y201904HLT042.
- Hiroki Takizawa. Othello is solved, 2024.
- Shubham Toshniwal, Sam Wiseman, Karen Livescu, and Kevin Gimpel. Learning chess blindfolded: Evaluating language models on state tracking. *ArXiv*, abs/2102.13249, 2021. URL <https://api.semanticscholar.org/CorpusID:232069003>.
- Hugo Touvron, Louis Martin, Kevin R. Stone, Peter Albert, Amjad Almahairi, Yasmine Babaei, Nikolay Bashlykov, Soumya Batra, Prajjwal Bhargava, Shruti Bhosale, Daniel M. Bikel, Lukas Blecher, Cristian Cantón Ferrer, Moya Chen, Guillem Cucurull, David Esiobu, Jude Fernandes, Jeremy Fu, Wenyin Fu, Brian Fuller, Cynthia Gao, Vedanuj Goswami, Naman Goyal, Anthony S. Hartshorn, Saghar Hosseini, Rui Hou, Hakan Inan, Marcin Kardas, Viktor Kerkez, Madian Khabsa, Isabel M. Kloumann, A. V. Korenev, Punit Singh Koura, Marie-Anne Lachaux, Thibaut Lavril, Jenya Lee, Diana Liskovich, Yinghai Lu, Yuning Mao, Xavier Martinet, Todor Mihaylov, Pushkar Mishra, Igor Molybog, Yixin Nie, Andrew Poulton, Jeremy Reizenstein, Rishi Rungta, Kalyan Saladi, Alan Schelten, Ruan Silva, Eric Michael Smith, R. Subramanian, Xia Tan, Binh Tang, Ross Taylor, Adina Williams, Jian Xiang Kuan, Puxin Xu, Zhengxu Yan, Iliyan Zarov, Yuchen Zhang, Angela Fan, Melanie Kambadur, Sharan Narang, Aurelien Rodriguez, Robert Stojnic, Sergey Edunov, and Thomas Scialom. Llama 2: Open foundation and fine-tuned chat models. *ArXiv*, abs/2307.09288, 2023. URL <https://api.semanticscholar.org/CorpusID:259950998>.
- Michiel van der Ree and Marco A Wiering. Reinforcement learning in the game of othello: Learning against a fixed opponent and learning from self-play. *2013 IEEE Symposium on Adaptive Dynamic Programming and Reinforcement Learning (ADPRL)*, pp. 108–115, 2013. URL <https://api.semanticscholar.org/CorpusID:1695896>.
- Ruoyao Wang, Graham Todd, Ziang Xiao, Xingdi Yuan, Marc-Alexandre Cot’e, Peter Clark, and Peter Jansen. Can language models serve as text-based world simulators? 2024. URL <https://api.semanticscholar.org/CorpusID:270371867>.
- Jiannan Xiang, Tianhua Tao, Yi Gu, Tianmin Shu, Zirui Wang, Zichao Yang, and Zhiting Hu. Language models meet world models: Embodied experiences enhance language models. *ArXiv*, abs/2305.10626, 2023. URL <https://api.semanticscholar.org/CorpusID:258762577>.
- Tian Yun, Zilai Zeng, Kunal Handa, Ashish V. Thapliyal, Bo Pang, Ellie Pavlick, and Chen Sun. Emergence of abstract state representations in embodied sequence modeling. In *Conference on Empirical Methods in Natural Language Processing*, 2023. URL <https://api.semanticscholar.org/CorpusID:265034007>.

## A DATASET STATISTICS

The details of the two datasets are listed in Table 4.

| CHAMPIONSHIP SYNTHETIC |                |                |
|------------------------|----------------|----------------|
| Num. of Games          | 132,588        | 23,796,010     |
| Avg. length            | $59.8 \pm 1.5$ | $60.0 \pm 0.8$ |
| Min. length            | 4              | 9              |
| Full length portion(%) | 95.0           | 99.1           |

Table 4: Dataset statistics of the two Othello datasets.

## B COMPARED METHODS

We perform our experiments using several existing baselines, with both Encoder-Decoder or Decoder-only structures. We first adopt some popular language models such as

**GPT-2.** We fine-tune GPT-2 to generate the whole game sequence step by step. Specifically, we use the smallest version of GPT-2.

**Bart.** We use Bart-base to generate the sequence by feeding the first token into the Encoder and fine-tuning the model to generate the remaining tokens.

**T5.** Similar as Bart, we adopt T5-base in our experiment.

We then adopt several LLMs for the task:

**Flan-T5.** We adopt Flan-T5-XL, which contains 3B parameters in our experiment.

**LLaMA-2.** We use LLaMA2-7B and only fine-tune the LoRA adapter in our experiment.

**Mistral.** We use Mistral-7B in our experiments. Similar to LLaMA-2, we also only fine-tune the LoRA adapter but keep the rest of parameters fixed.

## C MODEL SIZE ANALYSIS ON TWO-HOP GENERATION

We present the 2-hop performance across various model sizes in Figure 7. As we scale up the model, the error rate decreases, suggesting that a larger model size positively affects game understanding. However, the impact of model size diminishes when compared to the 1-hop performance, indicating a diminishing return on performance gains with increased model size.

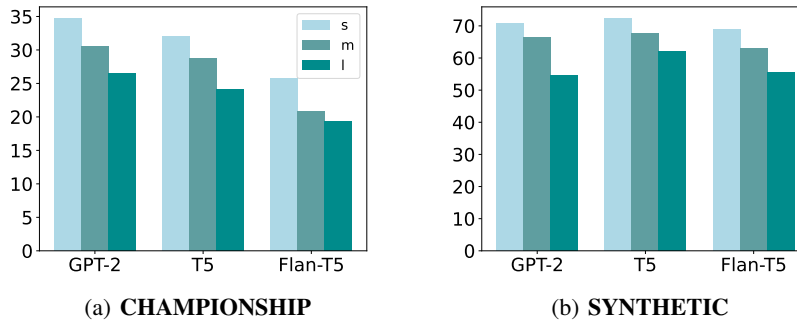

Figure 7: Othello 2-hop generation performance under different model sizes. All models are non-pretrained versions fine-tuned with 20k game sequences.

## D DATA SIZE ANALYSIS ON CHAMPIONSHIP DATASET

We also present the data size analysis on the CHAMPIONSHIP dataset (see Figure 8). We see similar conclusions as in Figure 3. The prediction accuracy gets better when we increase the data

size. Also, the error rate demonstrates a more steady drop in models pretrained with upstream language modeling tasks.

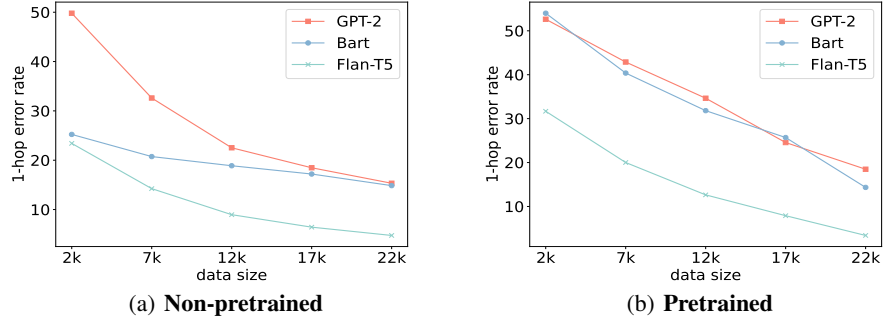

Figure 8: Analysis of 1-hop error rates on the CHAMPIONSHIP dataset with varying data scales.
